# Supplementary material
Source: HighWire-hosted journal article supplement (doi:10.1101/rna.033324.112)
Supplement: SuppLegends.docx [file SuppLegends.docx]

**Legends to Supplemental materials**

**Table S1: List of regulatory RNAs identified in this study and their properties.** A list of all the *trans*, *cis* and antisense (AS) regulatory RNAs identified in this study in *V. splendidus* is presented. The previously known RNAs (either by comparison with Rfam or with previously published studies) are highlighted in red. (.xls)

**Table S2: Oligonucleotides.** Sequences of all oligonucleotides used as probes for Northern blots. (.xls)

**Table S3: Summary of reannotations.** List of previously *V. splendidus* unannotated proteins whose expression was detected in this study and list of the genes for which the start codon was corrected. (.xls)

**Table S4: Expression level of *V. splendidus* genes**. The expression level of each gene is represented by its RPKM (See Materials and Methods). (.xls)

**Table S5.** **Phyletic distributions of putative sRNA genes and r5'UTRs across gamma-proteobacteria genomes**. For each RNA, the presence/absence of a homolog was determined as described in Material and Methods. Only RNAs for which at least one homolog was found are shown. Vertically, species are ordered according to a phylogenetic tree, based on 16S rRNA sequences (not shown). Outside the vibrionales, strains from the same species were collapsed into a single line. For each species/strains, the number of regulatory RNAs in common with *V. splendidus* was calculated (column C). Horizontally, regulatory RNAs were ordered according to decreasing i) number of vibrionaceae (line 2), then ii) number of total species where a homolog was found (line 3). In the case of Table S5A, additional manual clustering grouped together sRNAs that appeared to be restricted to vibrionales. For each species and regulatory RNA, a colored box indicates the presence of a homolog. The group of Vibrionaceae species is delimited by the *V. splendidus* line (in red, above) and a black line (below).

Table S5A: Phyletic distribution of the *trans* sRNAs. Boxes in yellow correspond to sRNAs that are present in all Vibrios (core sRNA candidates, CsrBs and Qrrs being present several times). Boxes in turquoise correspond to the sRNAs common to *V. splendidus* and *V. cholerae*. Boxes in light blue/grey correspond to sRNAs whose presence is best explained by lateral gene transfer between Vibrionaceae and Shewanellaceae.

Table S5B: Phyletic distribution of the *cis* r5'UTRs.The color code is identical to this on Table S5A. (.xls)

**Figure S1: Growth curve of *V. splendidus* and total RNA sample preparation.** *V. splendidus* was grown in marine salt medium at 20°C and growth was monitored by measuring OD at 600 nm. At the times and OD600 indicated by the arrows, samples were taken and total RNA was prepared, according to Materials and Methods. Quality of the RNA preparations was monitored first by agarose gel electrophoresis, then by Bionalyzer. (.pdf)

**Figure S2: Different possible size for Vsr320 as determined by RNA-seq depending on the clustering method.** The read cluster corresponding to the putative sRNA Vsr320 is represented in an Artemis window at nucleotide resolution. Possible sizes of Vsr320 according to the clustering procedure are indicated underneath. The putative longer size sRNA (in salmon on the - strand :145 nt) corresponds to a cluster including a single overlapping read extending the 3' end of the putative sRNA (arrow on the left) and an isolated read on the 5' end, at less than 20 nt of the main cluster (arrow on the right). The observed size on the Northern blot (≈ 85 nt, see Fig. 4) corresponds to the length of the sequence highlighted in yellow. A clustering method with d=0 (see Materials and Methods) would have left out the 3' end single read, resulting in a cluster of ≈100 nt, still larger than what is observed by Northern blotting. (.pdf)

**Figure S3**: **Boxplot representation of the distribution of the number of putative homologs of sRNA and r5'UTR candidates found in the gamma-proteobacteria species, compared to random intergenic sequences**. (A): Comparison between r5'UTRs and IGR random sequences with the same size distribution and similar positions in IGRs relative to neighboring genes. (B): Same for *trans* sRNAs. The boxplots represent the distribution of the number of species in which RNA homologs were found by BlastN, showing that conservation is higher for candidates than for the corresponding random sequences. The surface of the rectangle at the base of the diagram represents the number of the majority of hits. The mean value (indicated under the boxplot), the 3rd quartile, the upper whisker and the maximal value are all higher in the case of candidates than for random sequences. The significance of the difference between the results was evaluated by a Student's test and the corresponding p-value is indicated on top of each panel. (.pdf)

**Figure S4**: **Variations of the regulatory RNA candidate numbers in each category as a function of the clustering parameter "d".** "d" is the distance in nt below which two clusters of overlapping reads are merged (see also Fig. 2) (.pdf)
